# Supplementary material for: Stimuli-responsive gelation of Fmoc- l -tyrosine derivatives to form supramolecular architectures via cold atmospheric plasma treatment
Source: Royal Society of Chemistry journal article supplement (doi:10.1039/d5cp02585k), 2025-01-01
Supplement: d5cp02585k1.pdf [file d5cp02585k1.pdf]

## Supplementary Information

### Stimuli-Responsive Gelation of Fmoc-L-Tyrosine Derivatives to Supramolecular Architectures Via Cold Atmospheric Plasma

*Priya Bhatt<sup>a, b</sup>, Pranadhika Das<sup>a</sup>, Kamatchi Sankaranarayanan<sup>a, b\*</sup>*

<sup>a</sup> Physical Sciences Division, Institute of Advanced Study in Science and Technology, (An Autonomous Institute Under DST, Govt. of India), Vigyan Path, Paschim Boragaon, Garchuk, Guwahati, Assam 781035, India.

<sup>b</sup> Academy of Scientific and Innovative Research (AcSIR), Campus Postal Staff College Area, Sector 19, Kamla Nehru Nagar, Ghaziabad 201002, Uttar Pradesh, India

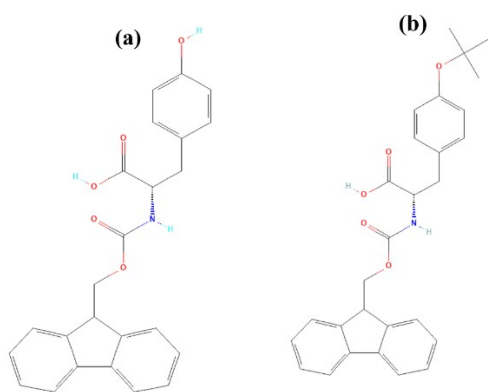

**Figure S1: (a) 2D chemical structure of (a) Fmoc-L-tyrosine (b) Fmoc-Tyr(tBu)-OH**

### **Fmoc-Tyrosine-tBu-OH**

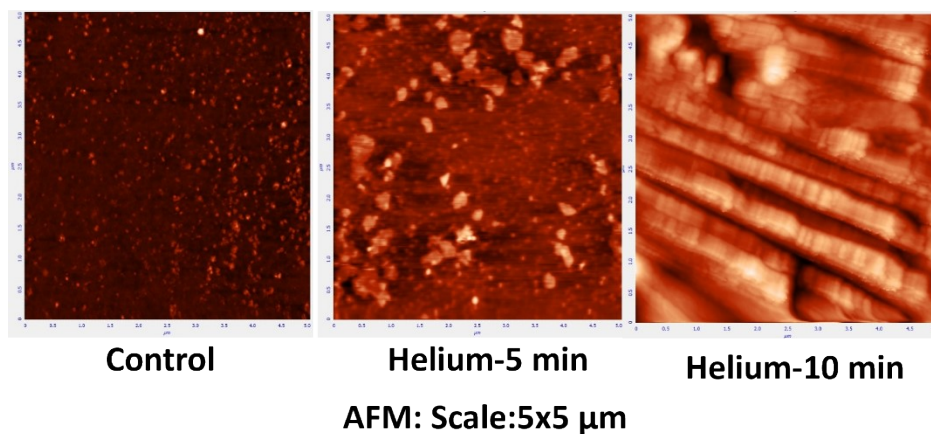

**Figure S2: AFM images of Fmoc-Tyr(tBu)-OH**

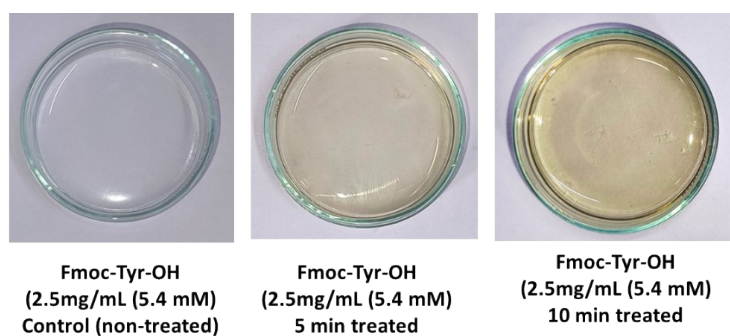

**Figure S3: Pictures of assemblies created by Fmoc-Tyr-OH at higher concentration (>5mM)**

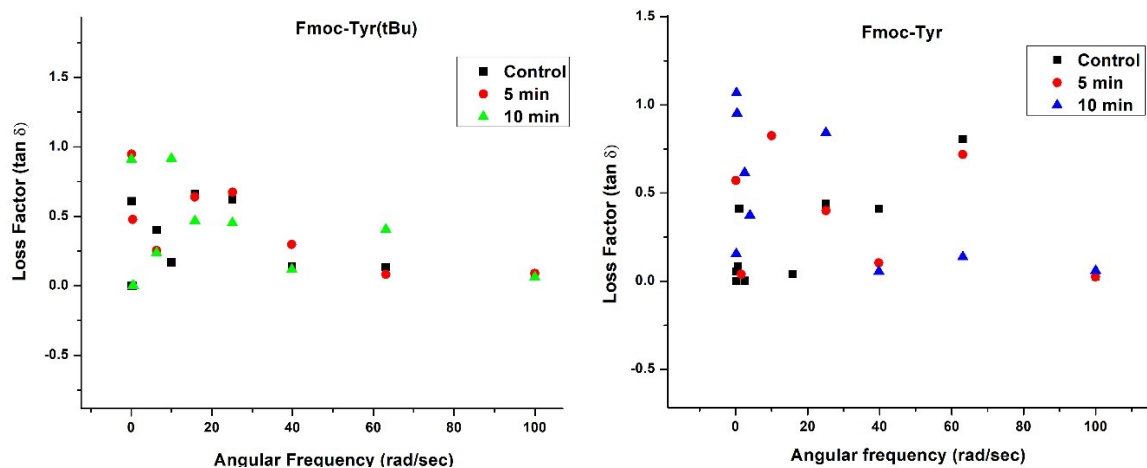

**Figure S4: Loss factor with respect to angular frequency, showing the independence of loss factor with angular frequency, a criterion indicating the formation of gels**

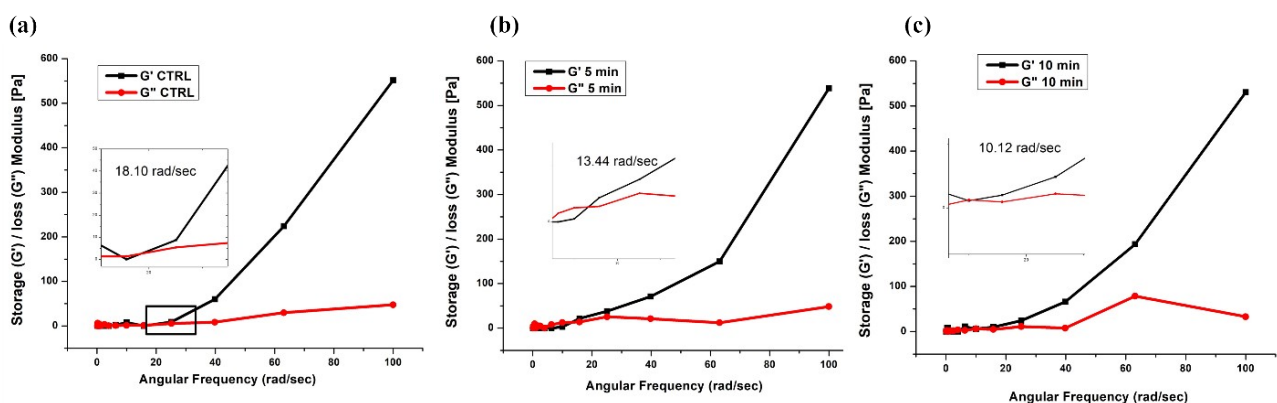

**Figure S5: Crossover frequencies decreasing with increasing CAP treatment time in the case of Fmoc-Tyr(tBu)-OH**

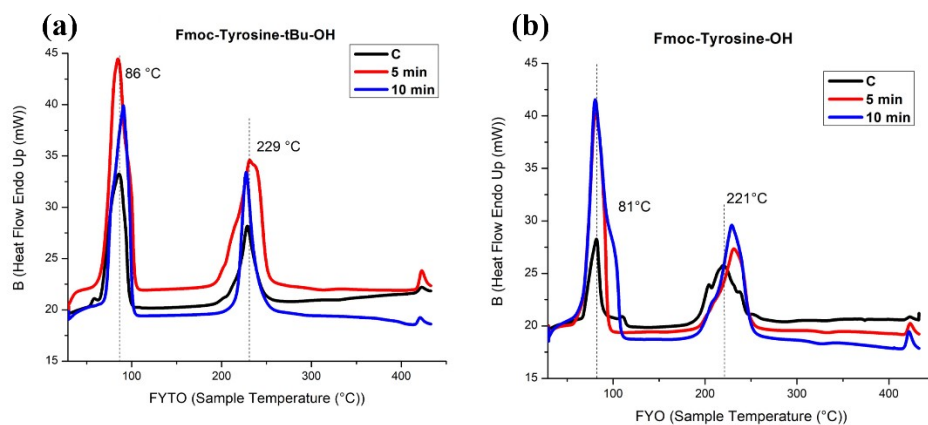

**Figure S6: DSC thermogram of the (a) Fmoc-tyrosine (b) Fmoc-Tyr(tBu)-OH**

**Table S1: Area under the curve found by the DSC thermogram**

| Sample/ time | 0 min  | 5 min  | 10 min |
|--------------|--------|--------|--------|
| FYtO         | 243.73 | 525.62 | 352.12 |
| FYO          | 84.28  | 352.14 | 513.40 |

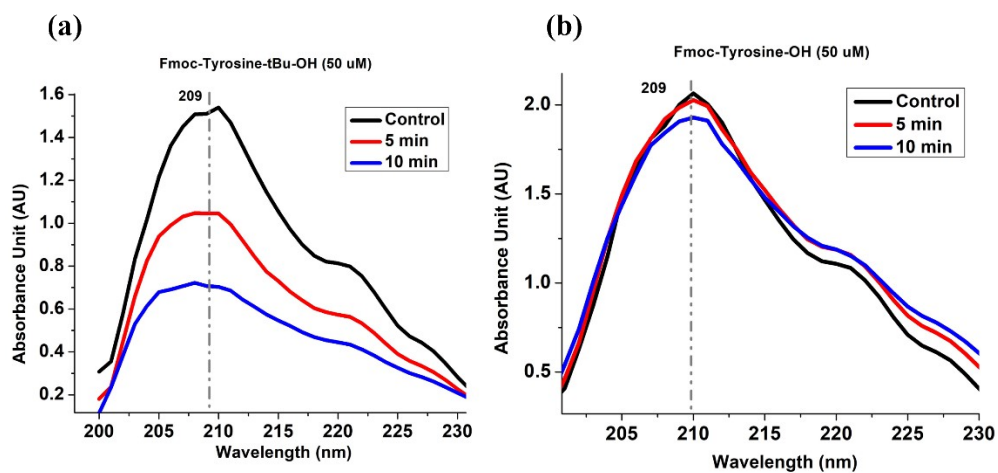

**Figure S7: Blue shifting of the UV-Vis absorbance peak (a) Fmoc-Tyr(tBu)-OH (b) Fmoc-tyrosine**

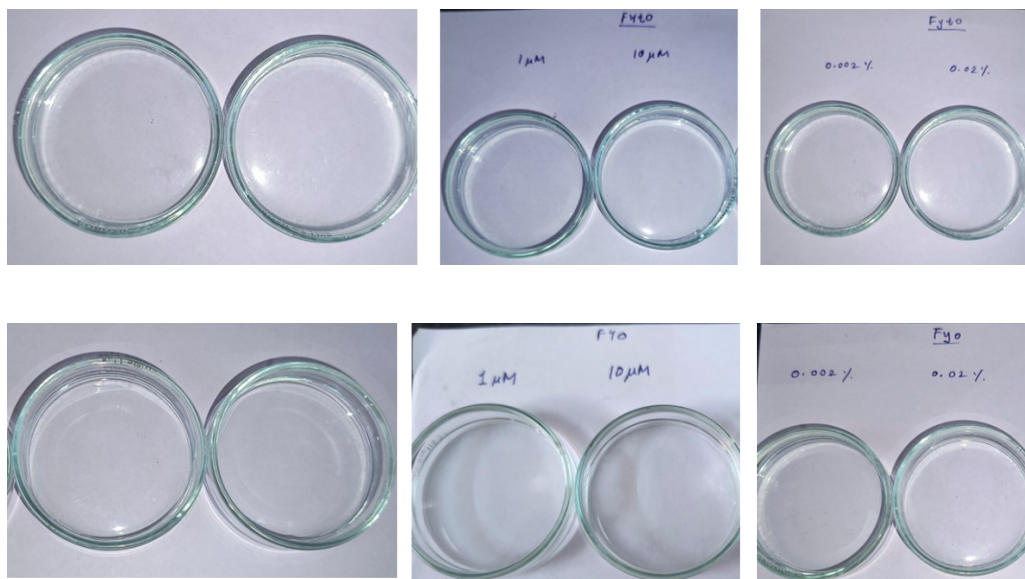

**Figure S8: No visual gelation found upon addition of  $\text{H}_2\text{O}_2$  and  $\text{NO}_3^-$  on Fmoc-Tyr(tBu)-OH (upper) and Fmoc-Tyr-OH (lower) control samples**

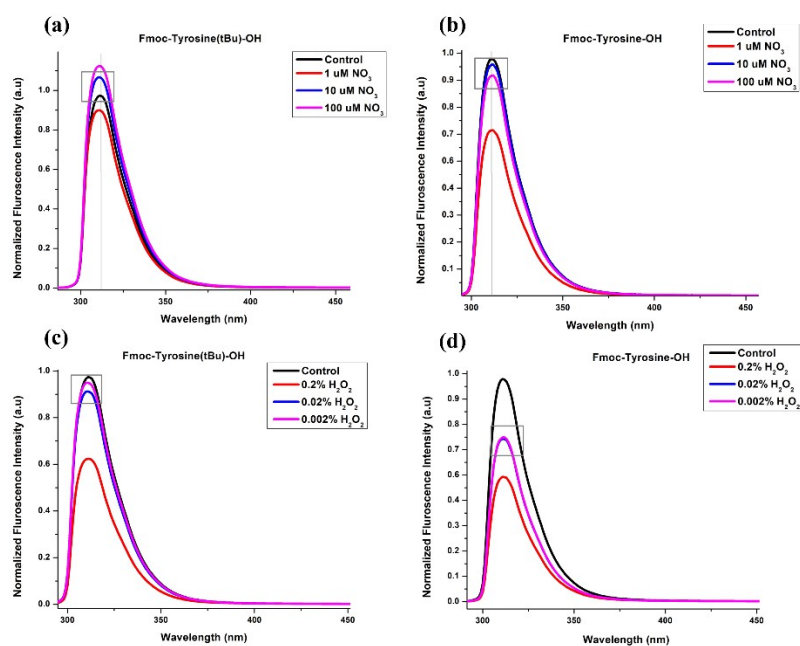

**Figure S9: Fluorescence quenching showing the effect of  $\text{NO}_3^-$  (a, b) and  $\text{H}_2\text{O}_2$  (c, d) in Fmoc-Tyr(tBu)-OH and Fmoc-Tyrosine**
